# Supplementary material
Source: PubMed Central journal article supplement (PMC7260059)

## Appendix 1: Examples of Discordance among Visual Field Progression Algorithms (3 algorithms progressing, 3 algorithms stable)

Example 1: 25161

Progressing on: VFI, PLR, PoPLR

Stable on: MD, AGIS, CIGTS

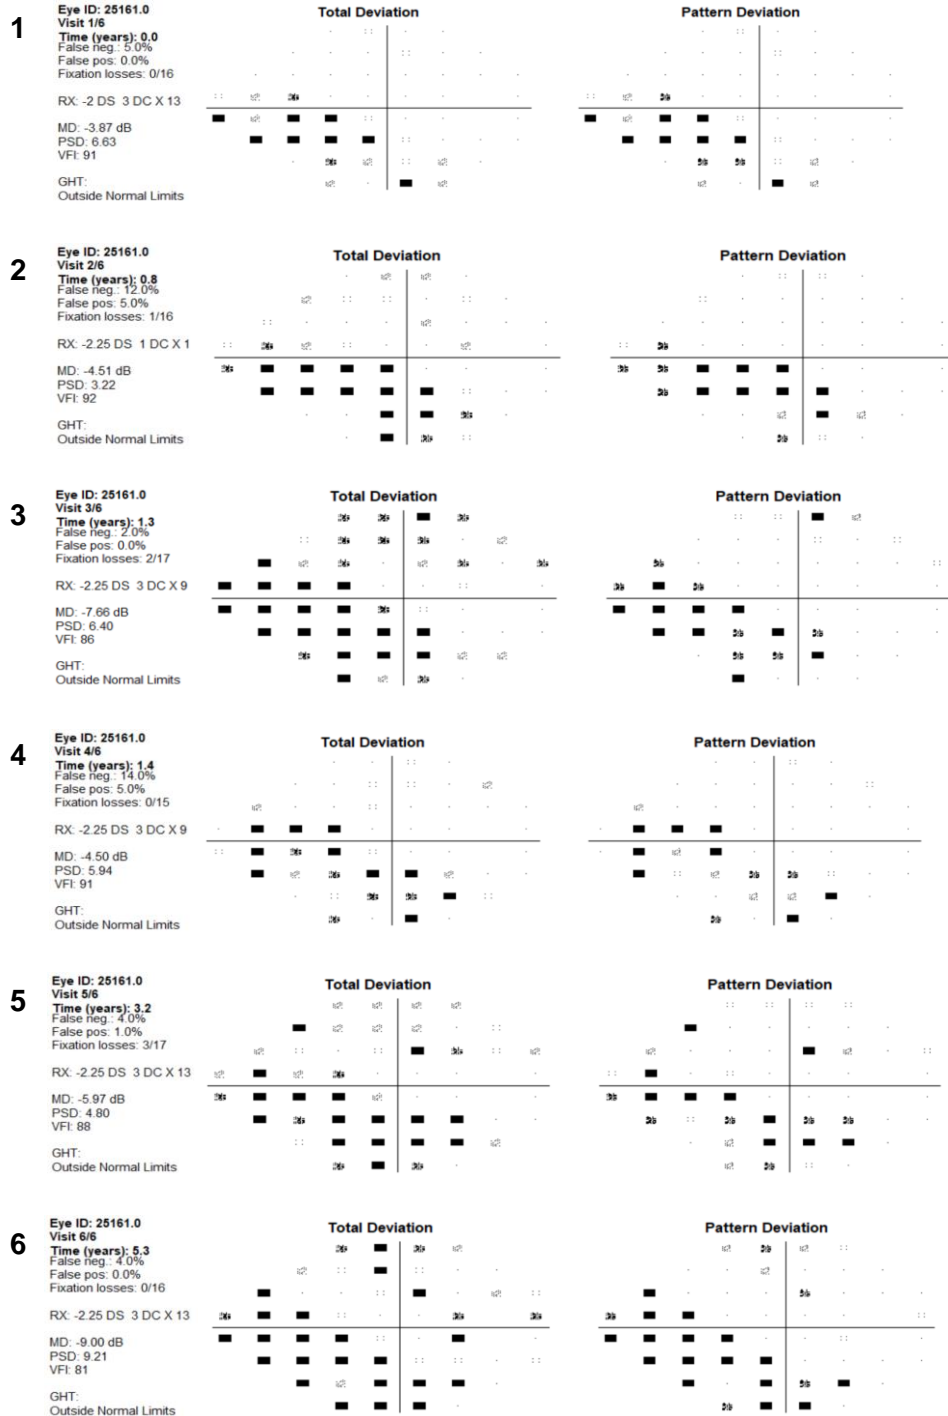

Example 2: 93602  
 Progressing on: VFI, PLR, PoPLR  
 Stable on: MD, AGIS, CIGTS

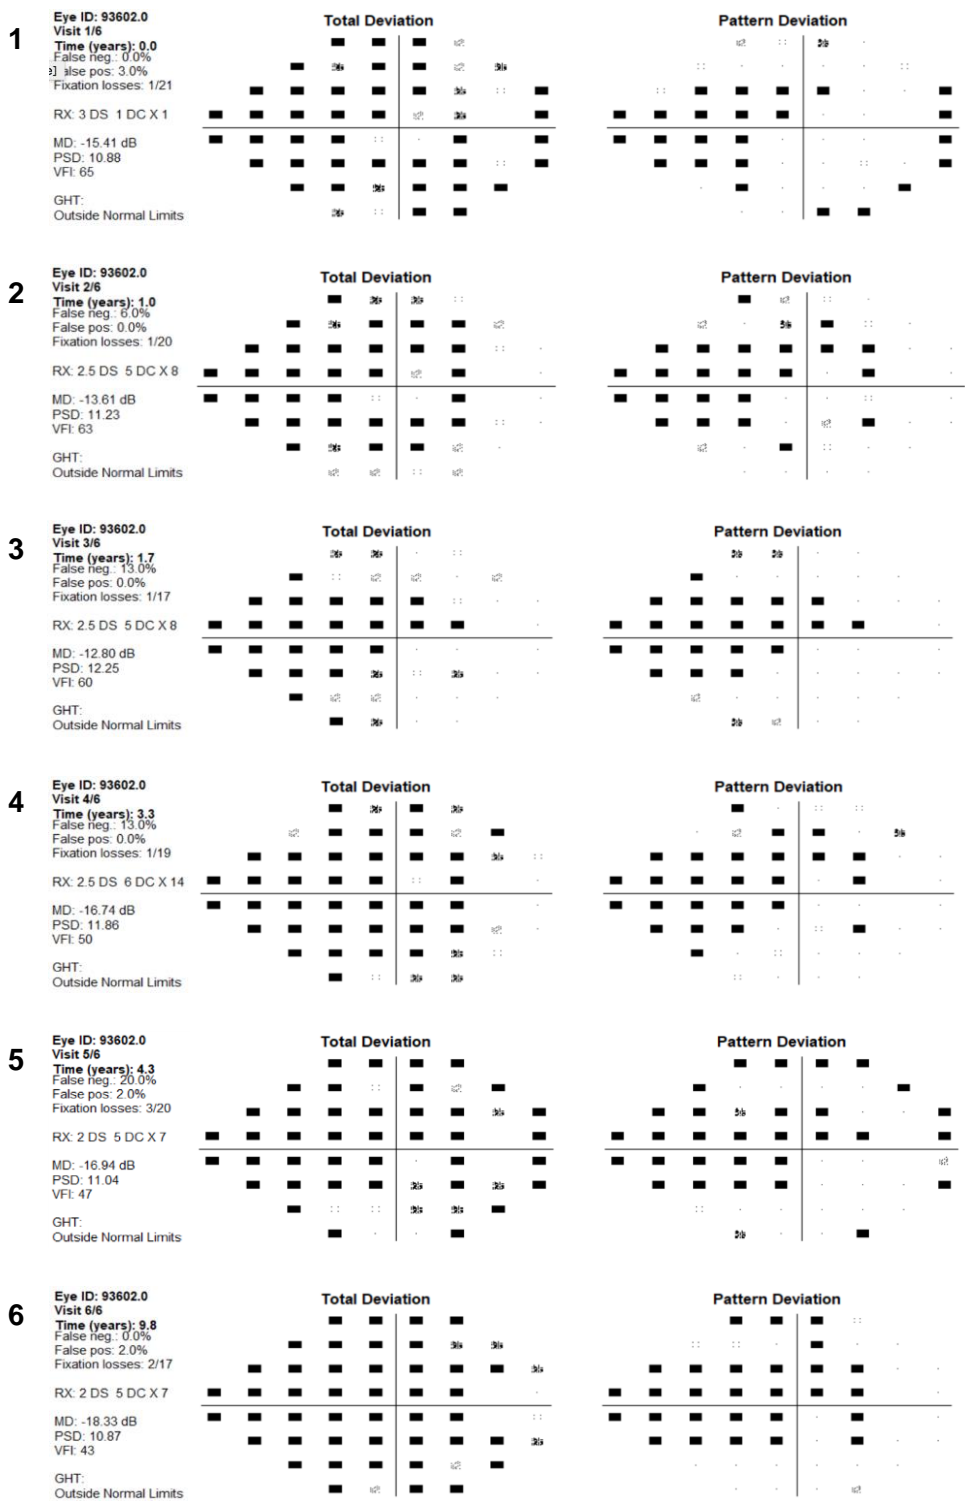

Supplement: NIHMS1524393-supplement-1.pdf [file NIHMS1524393-supplement-1.pdf]
